# Supplementary material
Source: PubMed Central journal article supplement (PMC3496420)

Supplement Fig. 1

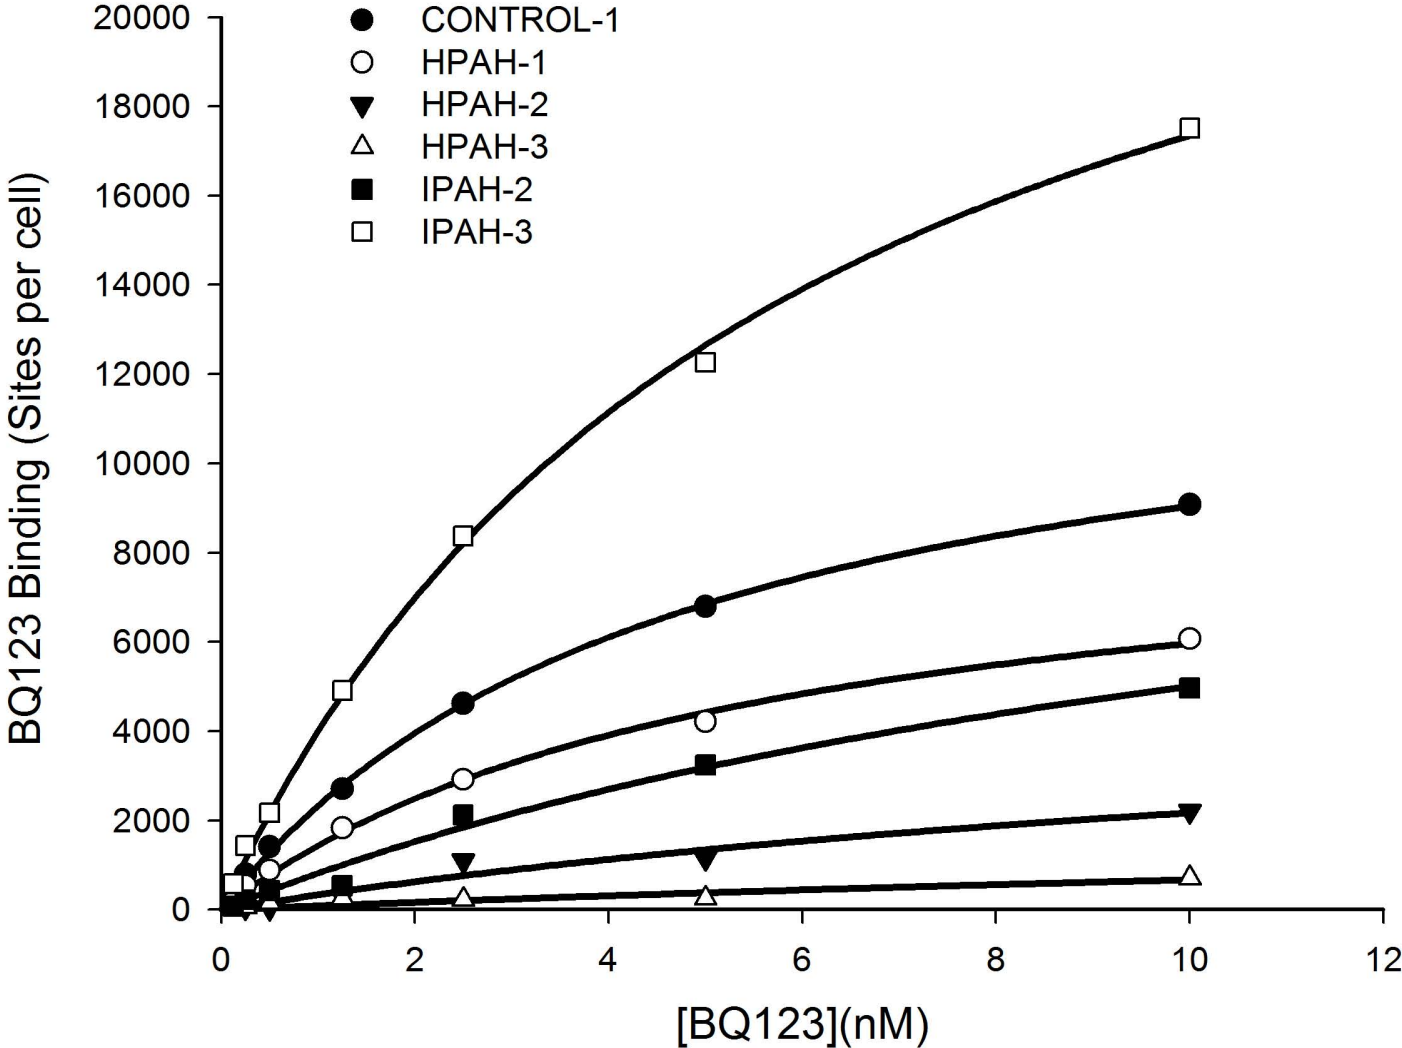

Supplement Fig. 2A.

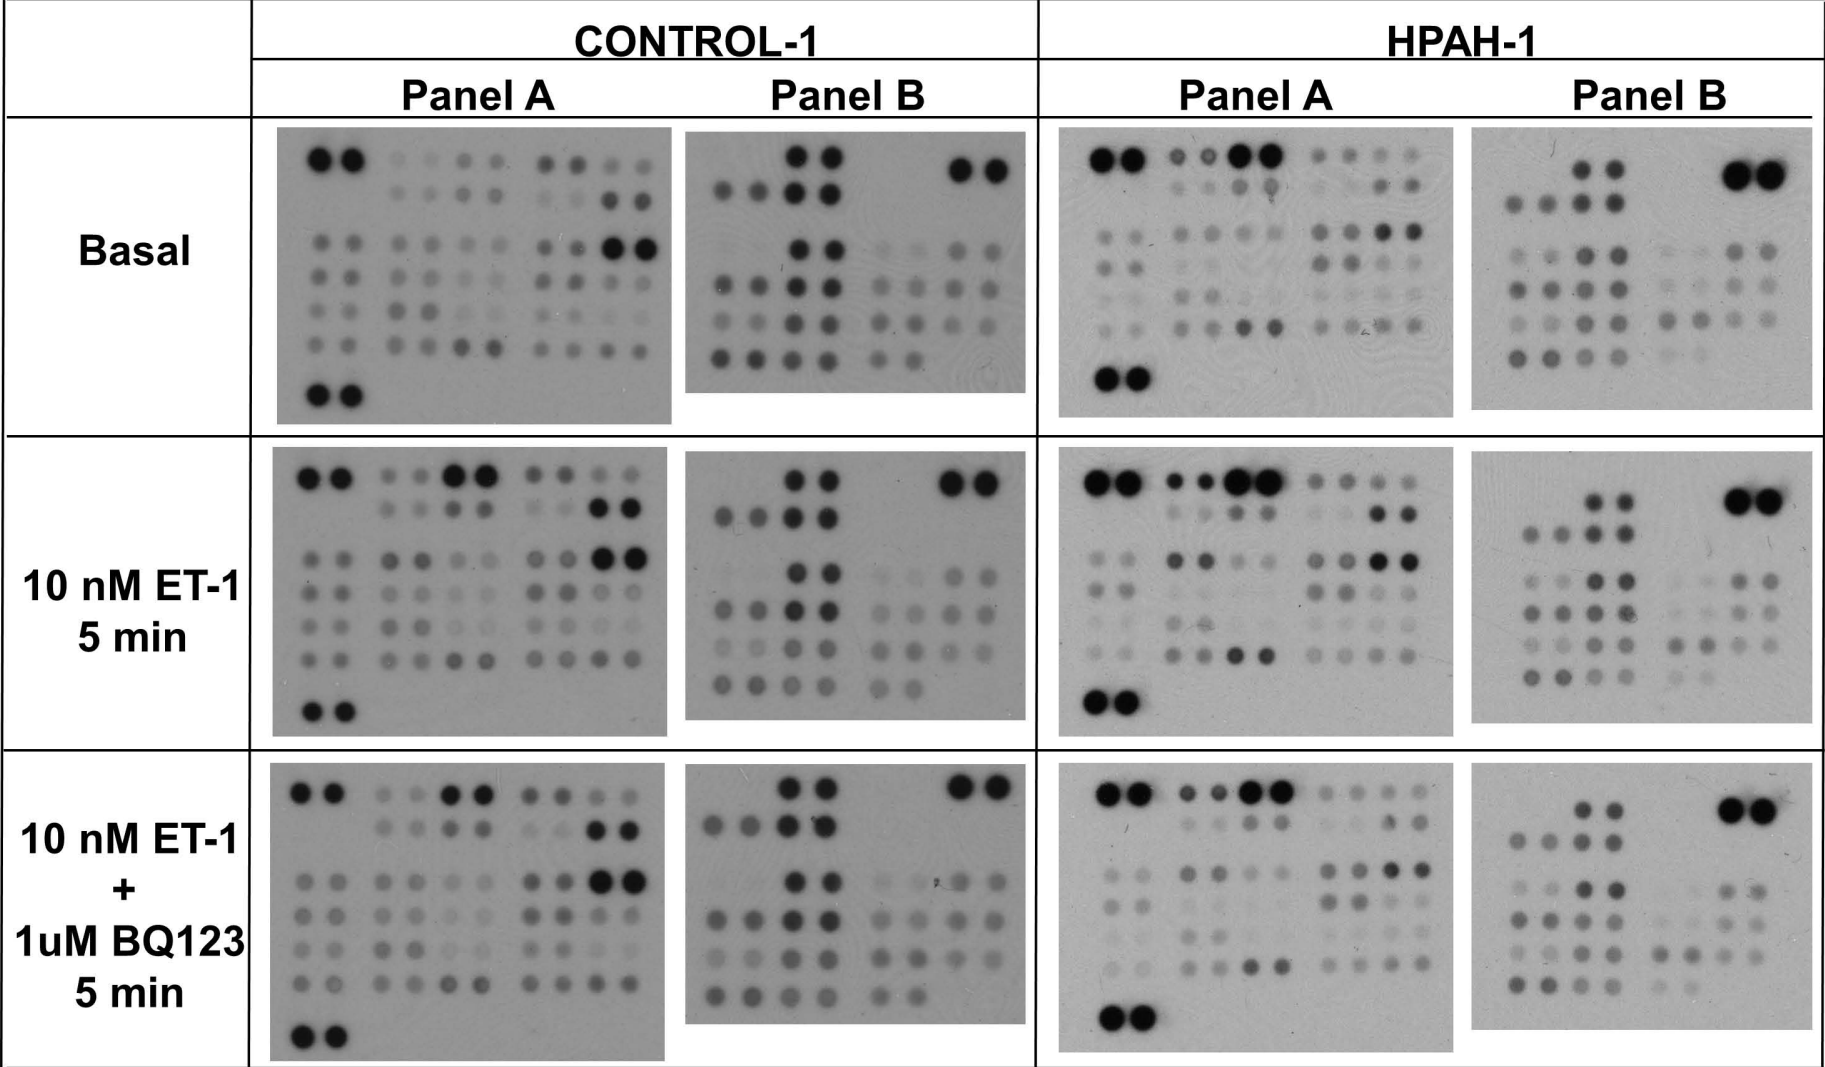

# Supplement Fig. 2B.

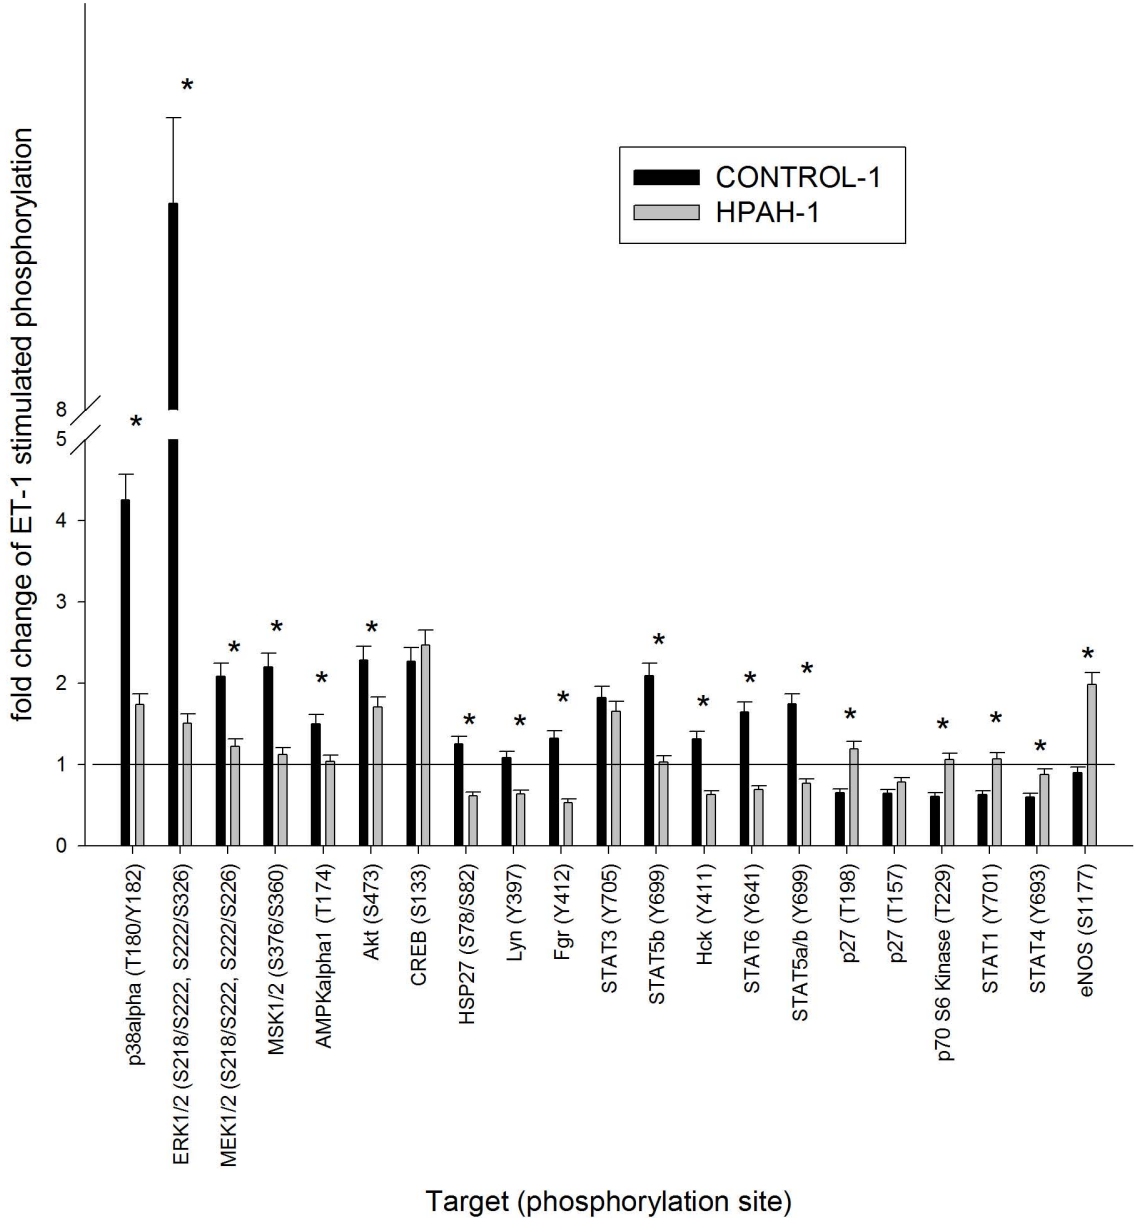

Supplement: NIHMS384376-supplement-Supp_Fig_S1-S2.pdf [file NIHMS384376-supplement-Supp_Fig_S1-S2.pdf]
